# Supplementary material for: Inter-individual variations in circadian misalignment-induced NAFLD pathophysiology in mice
Source: PubMed Central journal article supplement — iScience. 2024 Feb 5;27(2):108934. doi: 10.1016/j.isci.2024.108934 (PMC10964262; doi:10.1016/j.isci.2024.108934), 2024-02-05
Supplement: mmc1.pdf [file mmc1.pdf]

**Supplemental information**

**Inter-individual variations in circadian**

**misalignment-induced NAFLD pathophysiology in mice**

**Nobuya Koike, Yasuhiro Umemura, Hitoshi Inokawa, Isao Tokuda, Yoshiki Tsuchiya, Yuh Sasawaki, Atsushi Umemura, Naoko Masuzawa, Kazuya Yabumoto, Takashi Seya, Akira Sugimoto, Seung-Hee Yoo, Zheng Chen, and Kazuhiro Yagita**

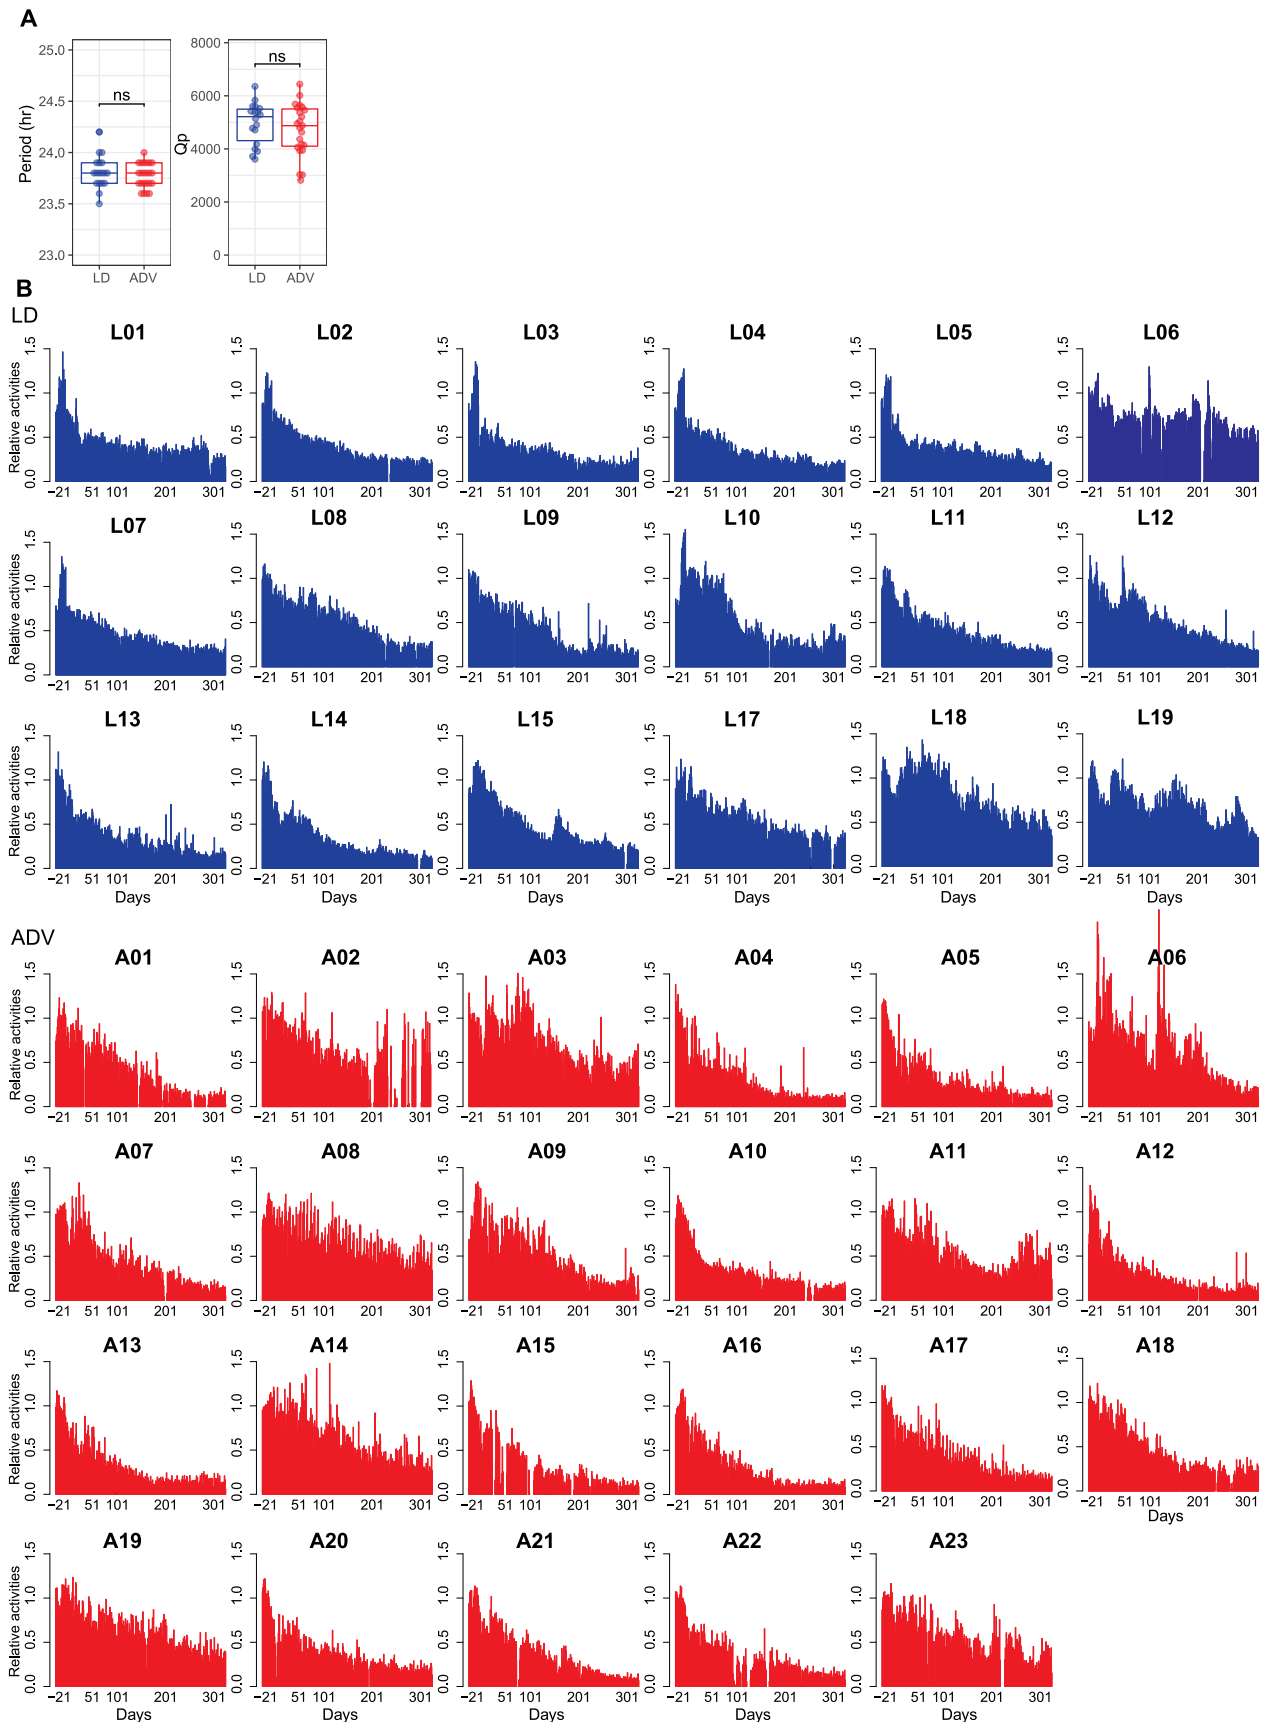

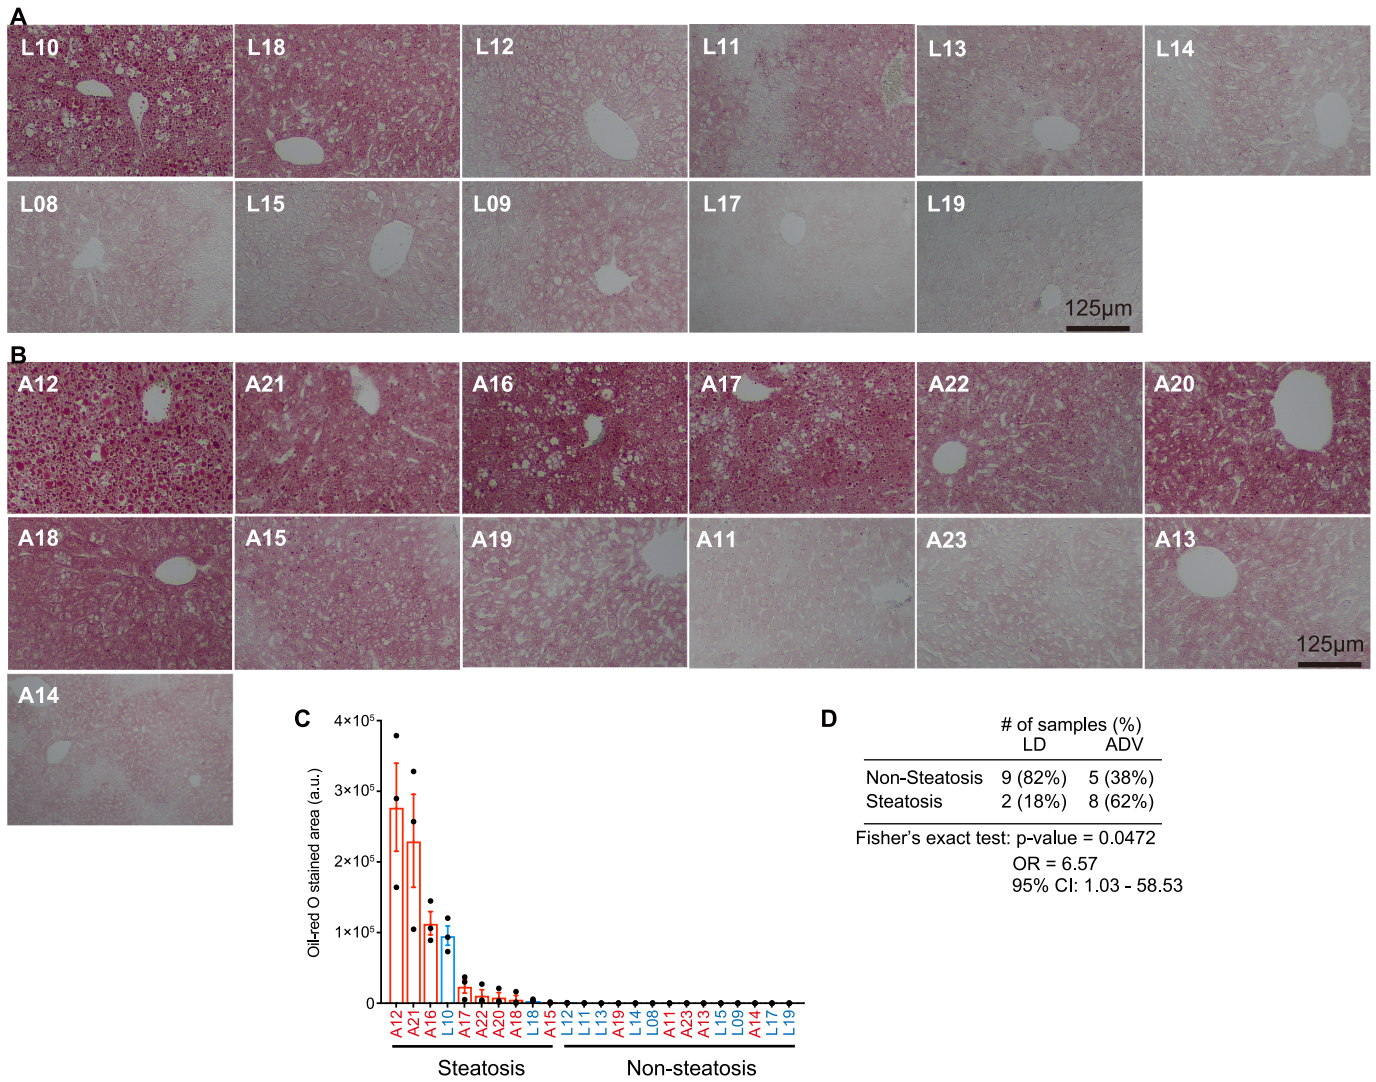

**Figure S2. Elevated likelihood of steatosis in the ADV mice, Related to Figure 2. (A and B)** Oil Red O stained liver from LD (A) and ADV (B) mice in the 2nd experiment. **(C)** Quantification of Oil Red O staining for analysis of hepatic lipid accumulation in ADV ( $n = 13$ ) and LD ( $n = 11$ ). Values are means  $\pm$  SD from triplicate. **(D)** The number of animals showed hepatic steatosis in LD and ADV. P value, OR and 95% CI is indicated from Fisher's exact test.

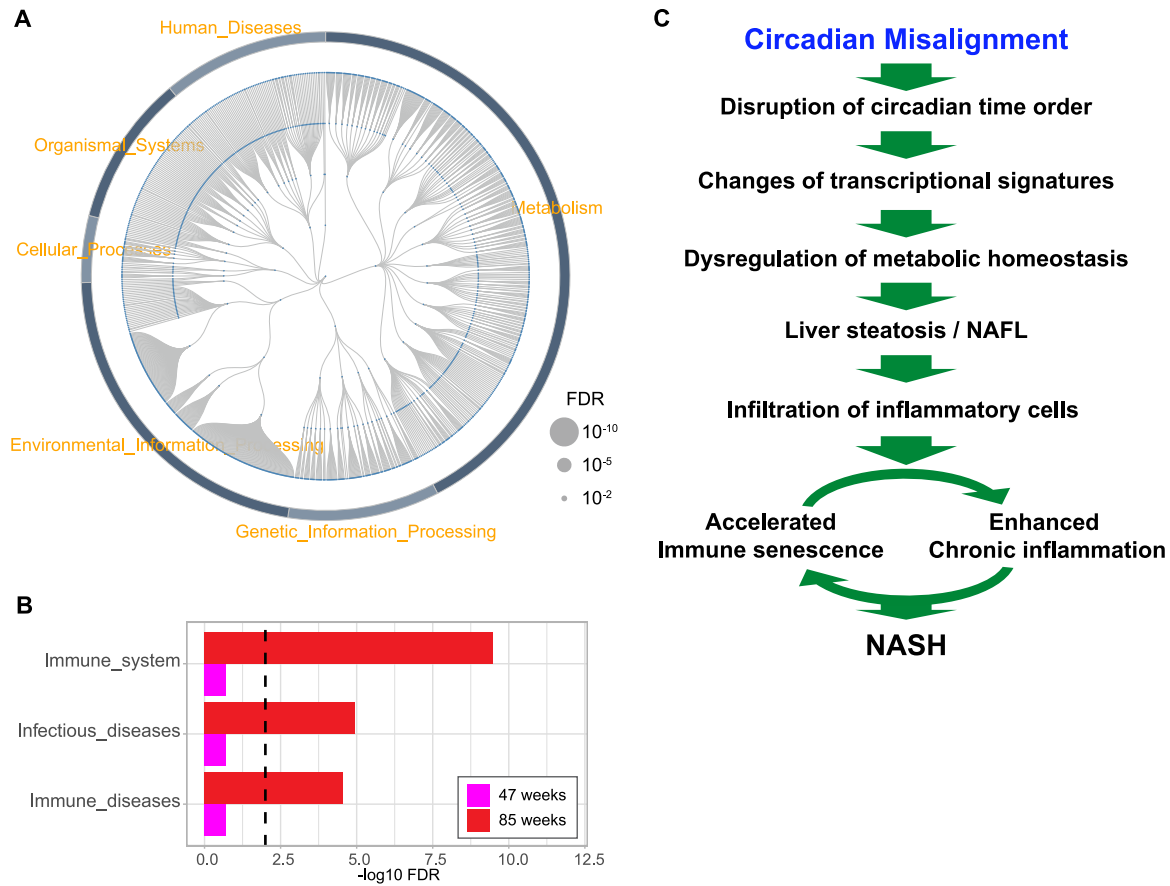

**Figure S3. The immune pathways were not significantly activated in the liver from 47-week ADV mice compared with LD mice, Related to Figure 3. (A)** Functree visualization showing no terms from the enrichment analysis based on KEGG functional hierarchy for gene expressions in the liver. Significance was determined by  $FDR < 0.01$ . **(B)** Activation of immune-related biological processes in the liver in a more prolonged jet-lag. Previously published RNA-seq data (GSE142248) of liver from mice exposed 85 weeks CJL were reanalyzed as described in the methods. Immune system, infectious diseases and immune diseases are significantly ( $FDR < 0.01$ ) up-regulated in ADV condition for 85 weeks compared with LD, whereas they are remained in subtle in ADV for 47 weeks. The black broken lines indicate  $FDR$  of 0.01. **(C)** Schematic representation of pathological process of circadian-related diseases in the liver, NAFLD / NASH.



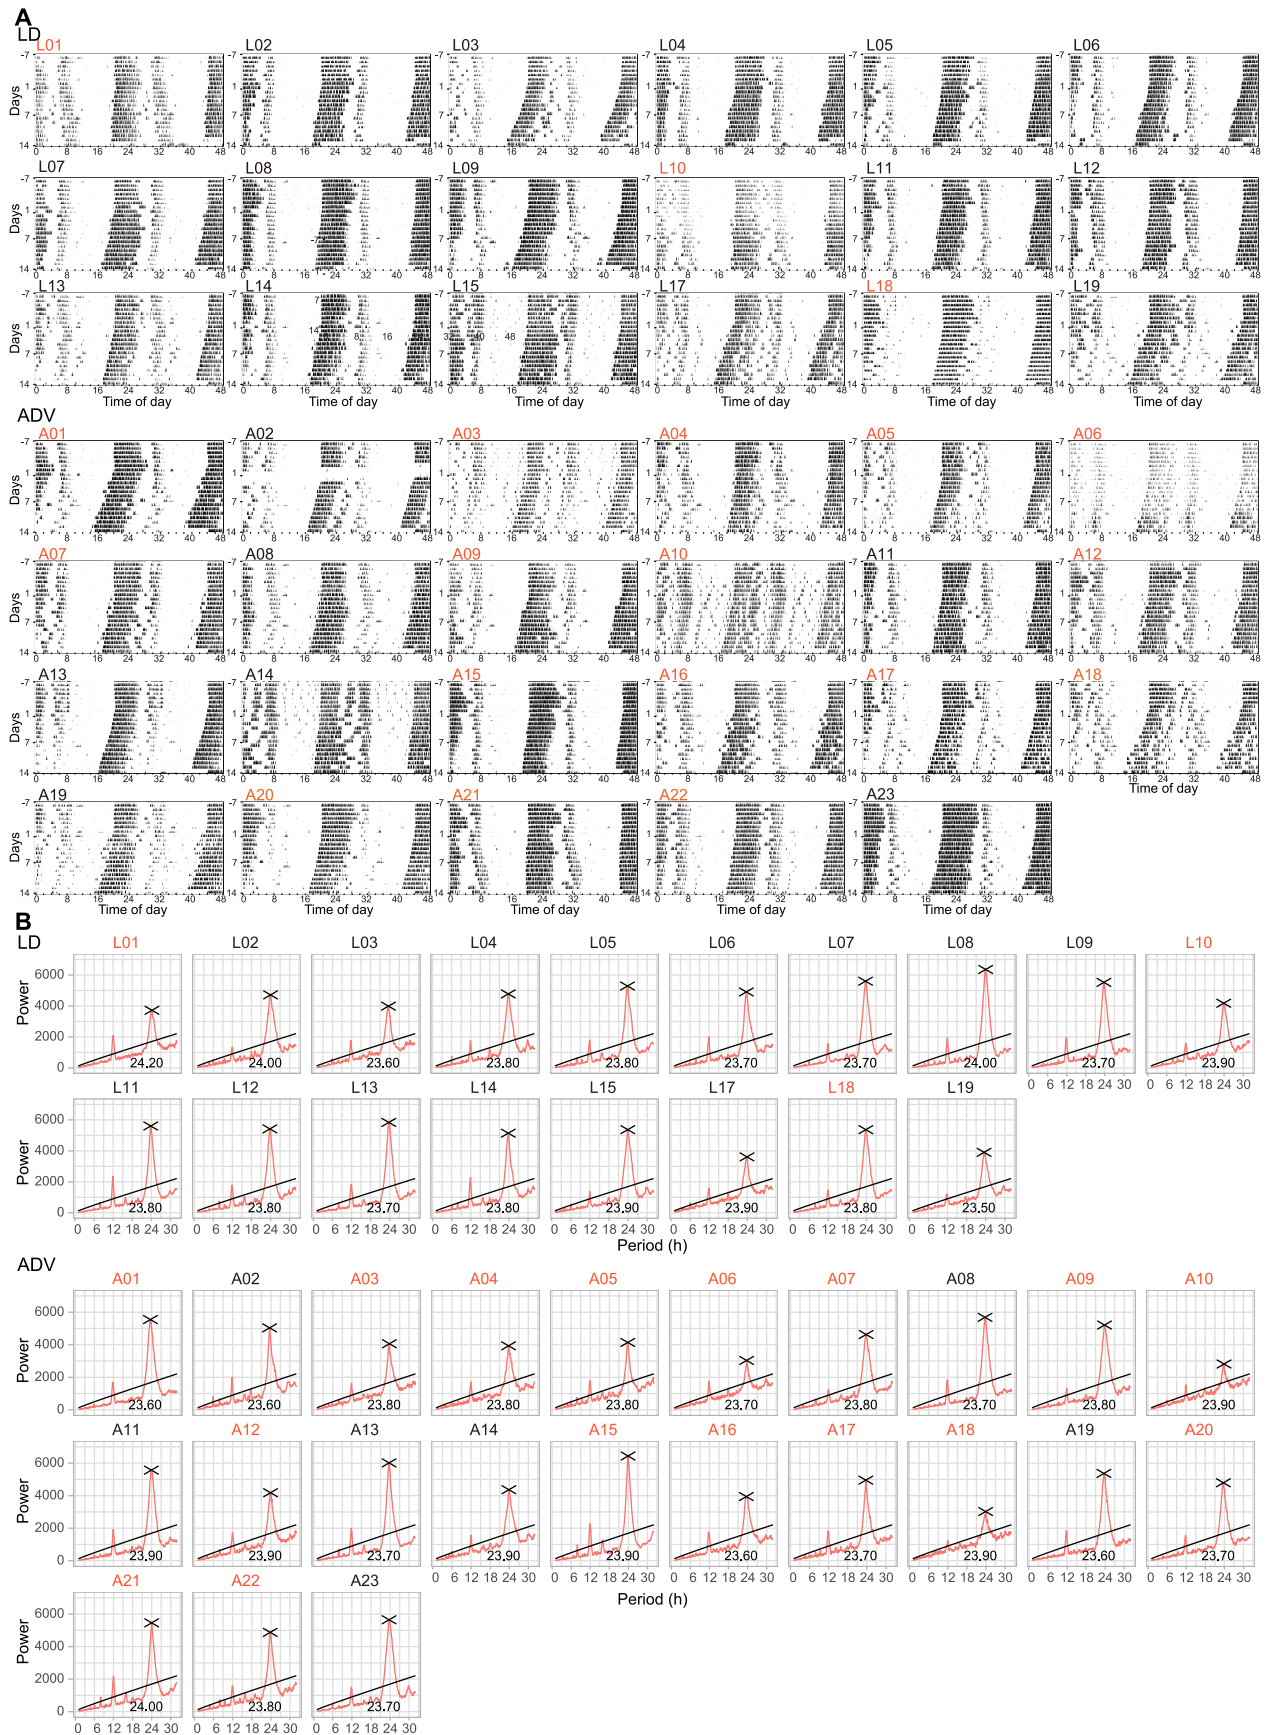

**Figure S4. The free-running circadian period in the ADV mice, Related to Figure 5. (A)** Double-plotted actogram of the ADV mice during the 7 days in LD and 14 days in DD before initiating CJL. The mice showed hepatic steatosis are indicated by orange in the text labels. **(B)** Chi-square periodogram of wheel-running activities in DD. The periodogram was calculated using 2nd week in DD. The oblique line in the periodogram indicates the significance level of  $\alpha = 0.001$ . The highest peak value above the line is indicated. The mice with hepatic steatosis are indicated in orange.
